# Supplementary material
Source: publisher figshare collection journal article supplement (https://gsajournals.figshare.com/ndownloader/files/25651742)
Supplement: Supplementary file 1 [file 25651742]

## Sheet: Sheet1
Table S4. Strains into which repair templates were injected, Cas9 and sgRNA source, and outcrossing details.
Strain	Promotor	Tissue	Genotype	Injection strain	Cas9 source	sgRNA source	Times Outcrossed to N2
DQM526	cdh-3p	Anchor cells	bmd176[cdh-3p::TIR1::F2A::mTagBFP2::AID*::NLS::tbb-2 3'UTR] II:-0.77	N2	pDD122	pDD122	2
DV3799	col-10p	Hypodermis	reSi1[col-10p::TIR1::F2A::mTagBFP2::AID*::NLS::tbb-2 3'UTR] I:-5.32	N2	pTD77	pTD77	2
DV3800	col-10p	Hypodermis	reSi2[col-10p::TIR1::F2A::mTagBFP2::AID*::NLS::tbb-2 3'UTR] II:-0.77	N2	pTD77	pTD77	2
DV3801	unc-54p	Muscle	reSi3[unc-54P::TIR1::F2A::mTagBFP2::AID*::NLS::tbb-2 3'UTR] I:-5.32	N2	pTD77	pTD77	2
DV3803	ges-1p	Intestine	reSi5[ges-1p::TIR1::F2A::mTagBFP2::AID*::NLS::tbb-2 3'UTR] I:-5.32	N2	pTD77	pTD77	2
DV3805	rgef-1p	Neuron	reSi7[rgef-1p::TIR1::F2A::mTagBFP2::AID*::NLS::tbb-2 3'UTR] I:-5.32	N2	pTD77	pTD77	2
DV3825	unc-54p	Muscle	reSi11[unc-54p::TIR1::F2A::mTagBFP2::AID*::NLS::tbb-2 3'UTR] II:-0.77	EG9882*	endogenous	pJW1850	2
DV3826	ges-1p	Intestine	reSi12[ges-1p::TIR1::F2A::mTagBFP2::AID*::NLS::tbb-2 3'UTR] II:-0.77	EG9882*	endogenous	pJW1850	2
JDW10	sun-1p	Germline	wrdSi3 [sun-1p::TIR1::F2A::mTagBFP2::AID*::NLS::tbb-2 3'UTR] II:-0.77	N2	pDD122	pDD122	3
JDW221	mex-5p	Germline	wrdSi18[mex-5p::TIR1::F2A::mTagBFP2::AID*::NLS::tbb-2 3'UTR] I:-5.32	JDW1*	pCZGY2747	pCZGY2747	3
JDW223	mex-5p	Germline	wrdSi35[mex-5p::TIR1::F2A::mTagBFP2::AID*::NLS::tbb-2 3'UTR] II:-0.77	JDW1*	pDD122	pDD122	3
JDW225	eft-3p	Soma	wrdSi23[eft-3p::TIR1::F2A::mTagBFP2::AID*::NLS::tbb-2 3'UTR] I:-5.32	EG9615*	endogenous	pJW1849	2
JDW227	dpy-7p	Hypodermis	wrdSi45[dpy-7p::TIR1::F2A::mTagBFP2::AID*::NLS::tbb-2 3'UTR] II:-0.77	EG9882*	endogenous	pJW1850	3
JDW229	dpy-7p	Hypodermis	wrdSi47[dpy-7p::TIR1::F2A::mTagBFP2::AID*::NLS::tbb-2 3'UTR] I:-5.32	EG9882*	endogenous	pJW1849	3
JDW231	minimal SCMp	Seam cells, hypodermis (faint)	wrdSi44[SCMp*::TIR1::F2A::mTagBFP2::AID*::NLS::tbb-2 3'UTR] II:-0.77	EG9882*	endogenous	pJW1850	3
JDW233	minimal SCMp	Seam cells, hypodermis (faint)	wrdSi46[SCMp*::TIR1::F2A::mTagBFP2::AID*::NLS::tbb-2 3'UTR] I:-5.32	EG9882*	endogenous	pJW1849	3
LP869	vha-8p	Excretory cell, hypodermis, gut, unidentified head cells	cpSi171[vha-8p::TIR1::F2A::mTagBFP2::AID*::NLS::tbb-2 3'UTR] I:-5.32	N2	pAP082	pAP082	0
LP870	myo-2p	Pharynx	cpSi172 [myo-2p::TIR1::F2A::mTagBFP2::AID*::NLS::tbb-2 3'UTR] I:-5.32	LP860*	pAP082	pAP082	1
LP871	myo-3p	Muscle	cpSi174[myo-3p::TIR1::F2A::mTagBFP2::AID*::NLS::tbb-2 3'UTR] I:-5.32	N2	pAP082	pAP082	0
EG9882* F53A2.9(oxTi1127[mex-5p::Cas9::tbb-2 3'UTR, hsp-16.41p::Cre::tbb-2 3'UTR, myo-2p::nls-CyOFP::let-858 3'UTR + lox2272] ) III
JDW1* nhr-23(wrd1[GFP::BioTag::AID*::3xFLAG]) I
EG9615* oxSi1091 [mex-5p::Cas9(smu-2 introns) unc-119+] II; unc-119(ed3) III
LP860* daf-2(e1370) III; lea-1i(cp431[mNG::3xFlag::AID*::lea-1 loxP]) V

## Sheet: Sheet2
	sgRNA target
Vector backbone	ttTi4348	ttTi5605	cxTi10882
pJW1838	pJW1849	pJW1850	pJW1851
pJW1839	pJW1882	pJW1883	pJW1884
